# Supplementary material for: Effective removal of uranium from aqueous solution by using novel sustainable porous Al2O3 materials derived from different precursors of aluminum
Source: Royal Society of Chemistry journal article supplement (doi:10.1039/c9qi01426h), 2019-12-11
Supplement: c9qi01426h1.pdf [file c9qi01426h1.pdf]

## Supporting Information

### **Effective Removal of Uranium from Aqueous Solution by Using Novel Sustainable Porous Al<sub>2</sub>O<sub>3</sub> Materials Derived from Different Precursors of Aluminum**

Jun Liao<sup>a,b</sup>, Yong Zhang<sup>a,b\*</sup>

<sup>a</sup> State Key Laboratory of Environmental Friendly Energy Materials, School of National Defence Science and Technology, Southwest University of Science and Technology, Mianyang 621010, P. R. China

<sup>b</sup> Sichuan Co-Innovation Center for New Energetic Materials, Southwest University of Science and Technology, Mianyang 621010, P. R. China

\*Corresponding author. E-mail: [pandmzy@foxmail.com](mailto:pandmzy@foxmail.com) (Y. Zhang).

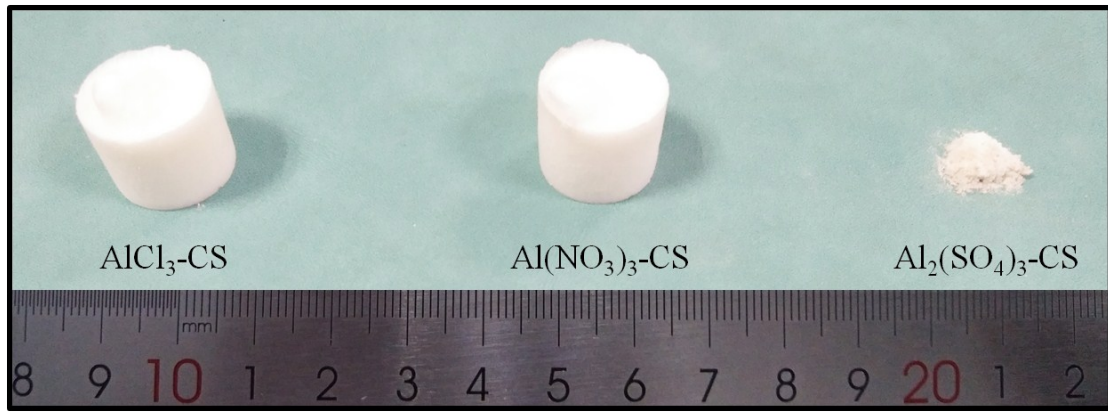

Figure S1. Photos of  $\text{AlCl}_3\text{-CS}$ ,  $\text{Al}(\text{NO}_3)_3\text{-CS}$  and  $\text{Al}_2(\text{SO}_4)_3\text{-CS}$  composites.

Table S1. The density for the synthesis of  $\text{AlCl}_3\text{-CS}$ ,  $\text{Al}(\text{NO}_3)_3\text{-CS}$  and  $\text{Al}_2(\text{SO}_4)_3\text{-CS}$  composites.

| Samples                                | $m(\text{mg})$ | $d(\text{cm})$ | $h(\text{cm})$ | $V(\text{cm}^3)$ | $\rho(\text{mg}/\text{cm}^3)$ |
|----------------------------------------|----------------|----------------|----------------|------------------|-------------------------------|
| $\text{AlCl}_3\text{-CS}$              | 94.32          | 2.30           | 2.30           | 9.55             | 9.88                          |
| $\text{Al}(\text{NO}_3)_3\text{-CS}$   | 96.77          | 2.25           | 2.30           | 9.15             | 10.58                         |
| $\text{Al}_2(\text{SO}_4)_3\text{-CS}$ | –              | –              | –              | –                | –                             |

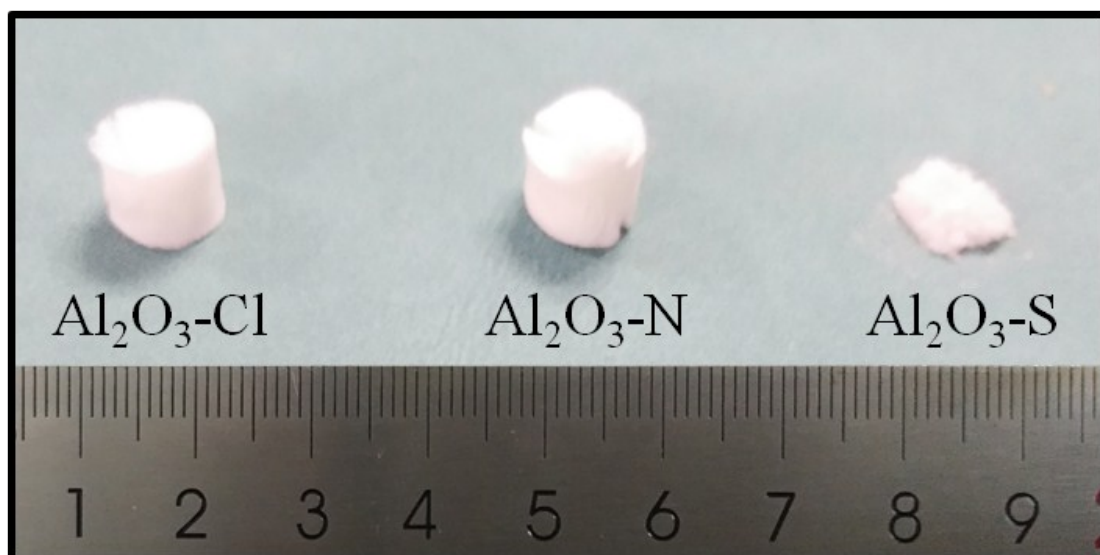

Figure S2. Photos of porous Al<sub>2</sub>O<sub>3</sub>-Cl, Al<sub>2</sub>O<sub>3</sub>-N and Al<sub>2</sub>O<sub>3</sub>-S materials.

Table S2. The density for the synthesis of porous Al<sub>2</sub>O<sub>3</sub>-Cl, Al<sub>2</sub>O<sub>3</sub>-N and Al<sub>2</sub>O<sub>3</sub>-S materials.

| Samples                            | <i>m</i> (mg) | <i>d</i> (cm) | <i>h</i> (cm) | <i>V</i> (cm <sup>3</sup> ) | <i>ρ</i> (mg/cm <sup>3</sup> ) |
|------------------------------------|---------------|---------------|---------------|-----------------------------|--------------------------------|
| Al <sub>2</sub> O <sub>3</sub> -Cl | 6.93          | 1.10          | 1.10          | 1.05                        | 6.60                           |
| Al <sub>2</sub> O <sub>3</sub> -N  | 7.71          | 1.05          | 1.10          | 0.95                        | 8.12                           |
| Al <sub>2</sub> O <sub>3</sub> -S  | –             | –             | –             | –                           | –                              |

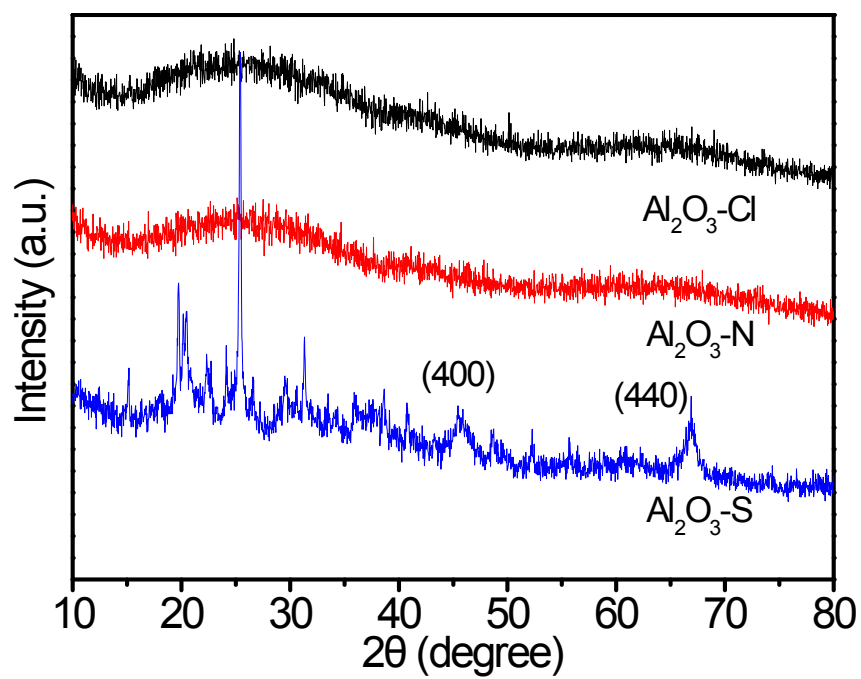

Figure S3. XRD patterns of porous  $\text{Al}_2\text{O}_3\text{-Cl}$ ,  $\text{Al}_2\text{O}_3\text{-N}$  and  $\text{Al}_2\text{O}_3\text{-S}$  materials.

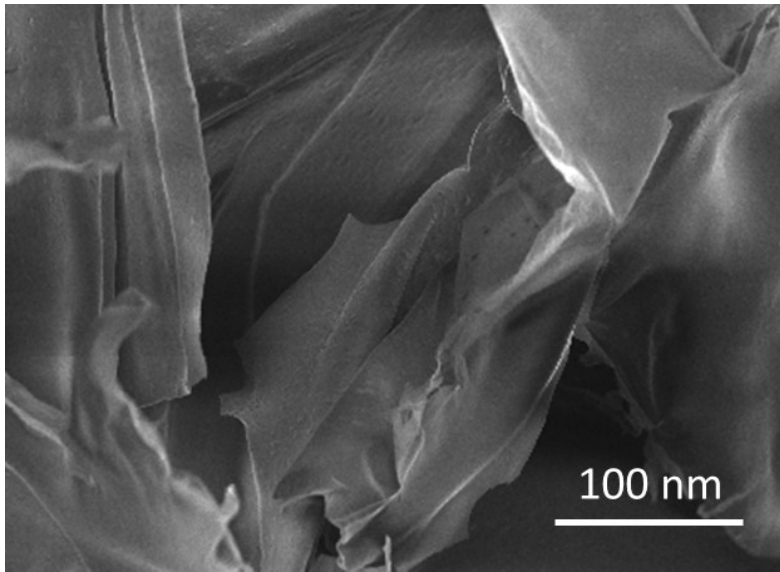

Figure S4. SEM image of pure chitosan viewed at high magnifications.

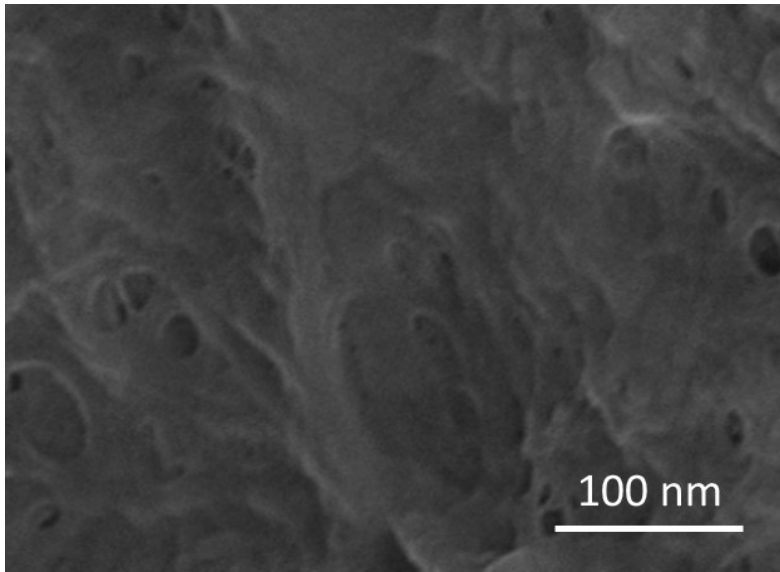

Figure S5. SEM image of AlCl<sub>3</sub>-CS composite viewed at high magnifications.



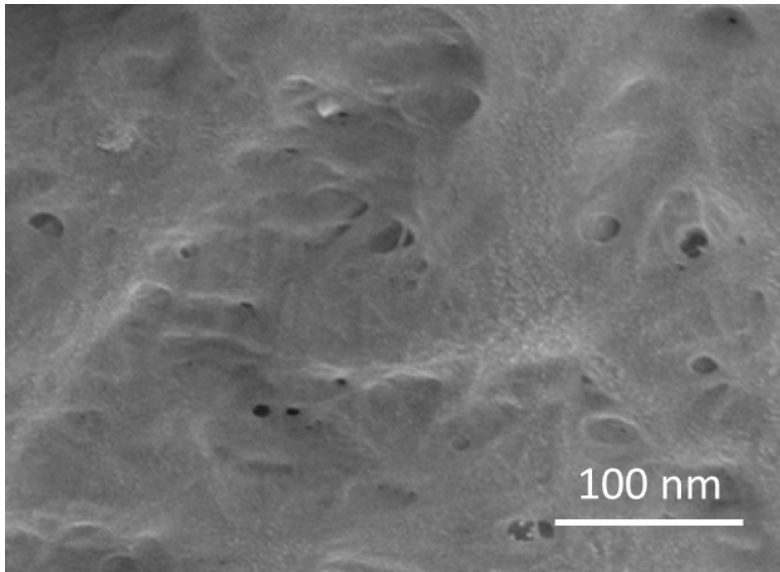

Figure S6. SEM image of Al(NO<sub>3</sub>)<sub>3</sub>-CS composite viewed at high magnifications.

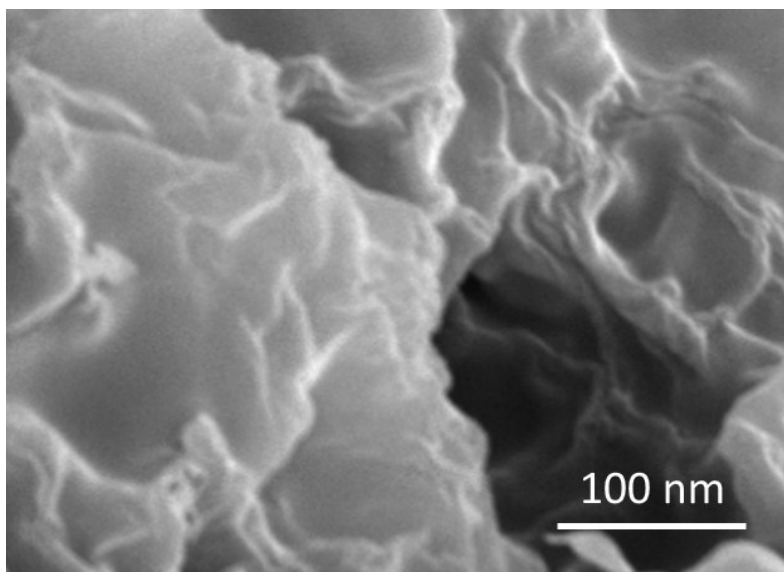

Figure S7. SEM image of Al<sub>2</sub>(SO<sub>4</sub>)<sub>3</sub>-CS composite viewed at high magnifications.

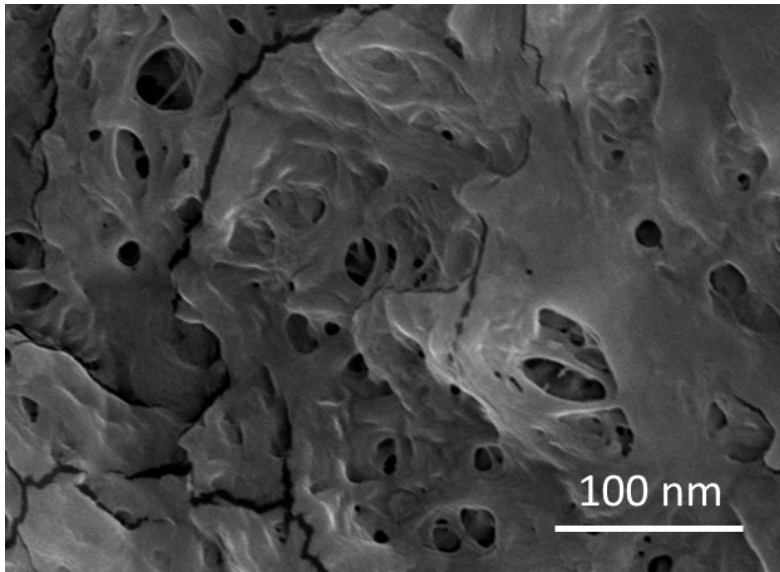

Figure S8. SEM image of Al<sub>2</sub>O<sub>3</sub>-Cl material viewed at high magnifications.

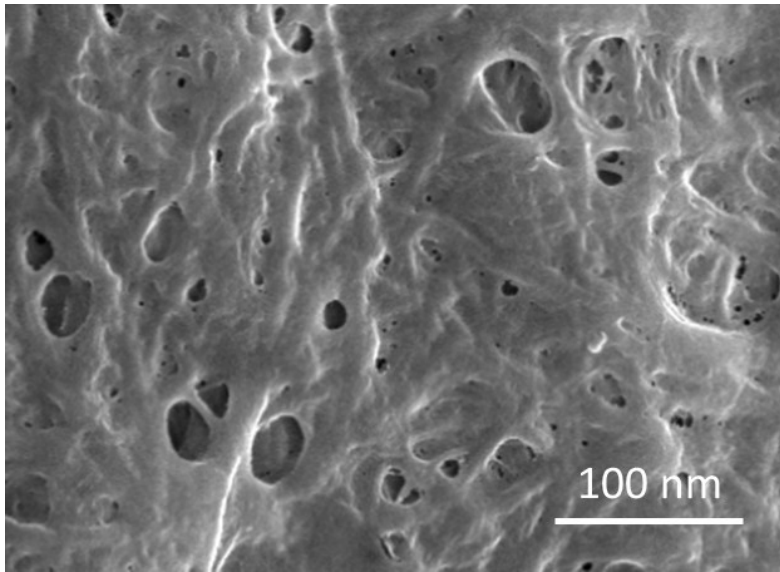

Figure S9. SEM image of Al<sub>2</sub>O<sub>3</sub>-N material viewed at high magnifications.

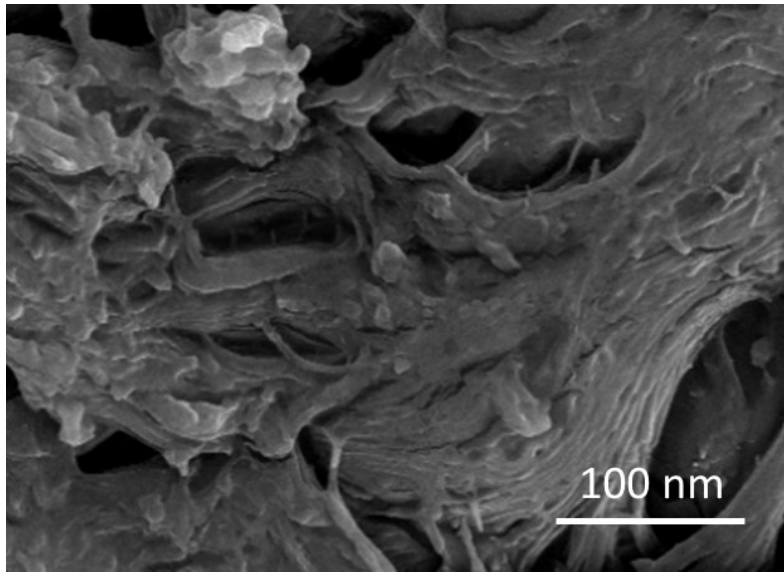

Figure S10. SEM image of Al<sub>2</sub>O<sub>3</sub>-S material viewed at high magnifications.

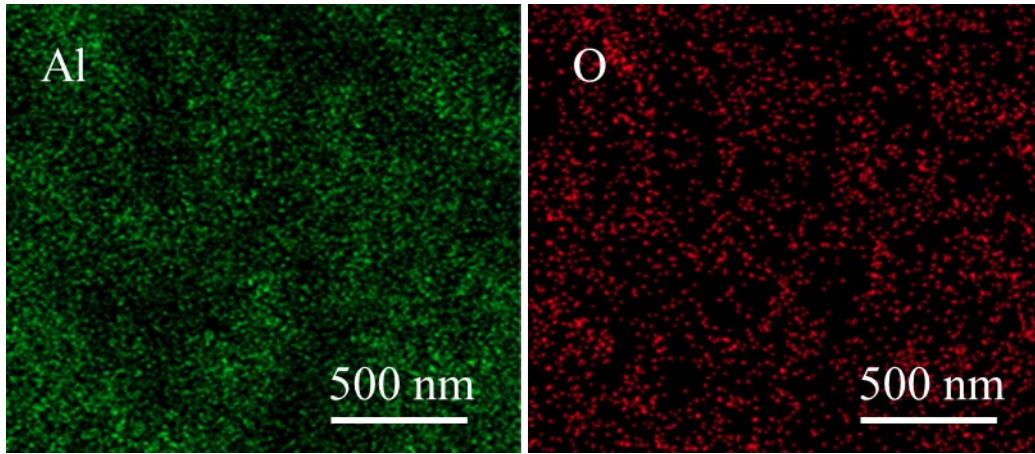

Figure S11. EDS mapping images of Al and O of  $\text{Al}_2\text{O}_3\text{-Cl}$  material.

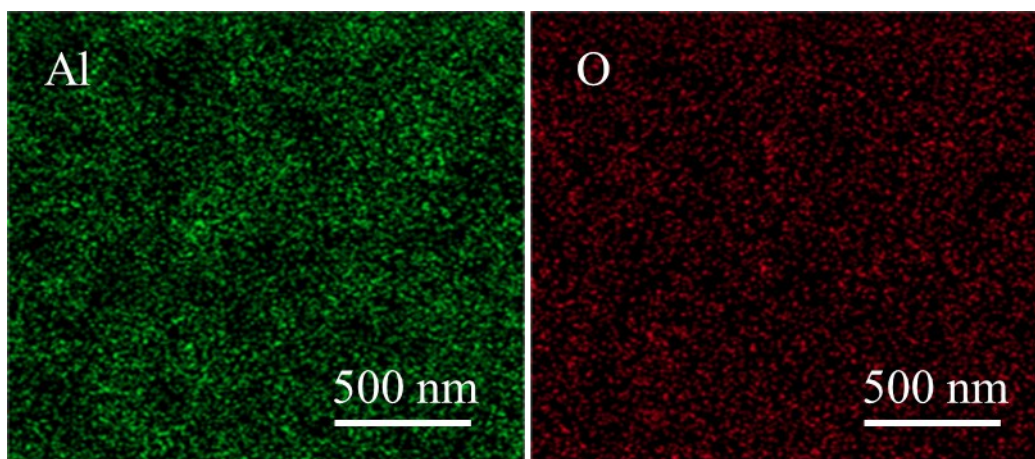

Figure S12. EDS mapping images of Al and O of  $\text{Al}_2\text{O}_3\text{-N}$  material.

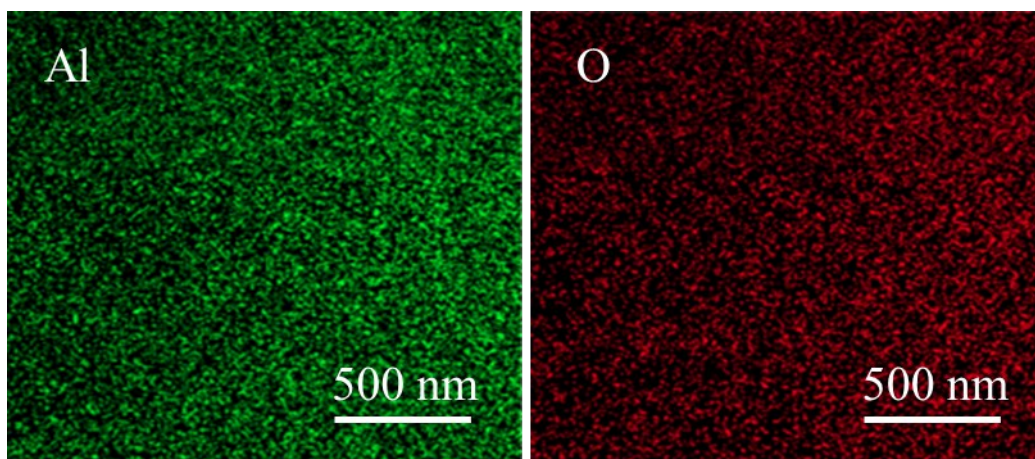

Figure S13. EDS mapping images of Al and O of  $\text{Al}_2\text{O}_3$ -S material.



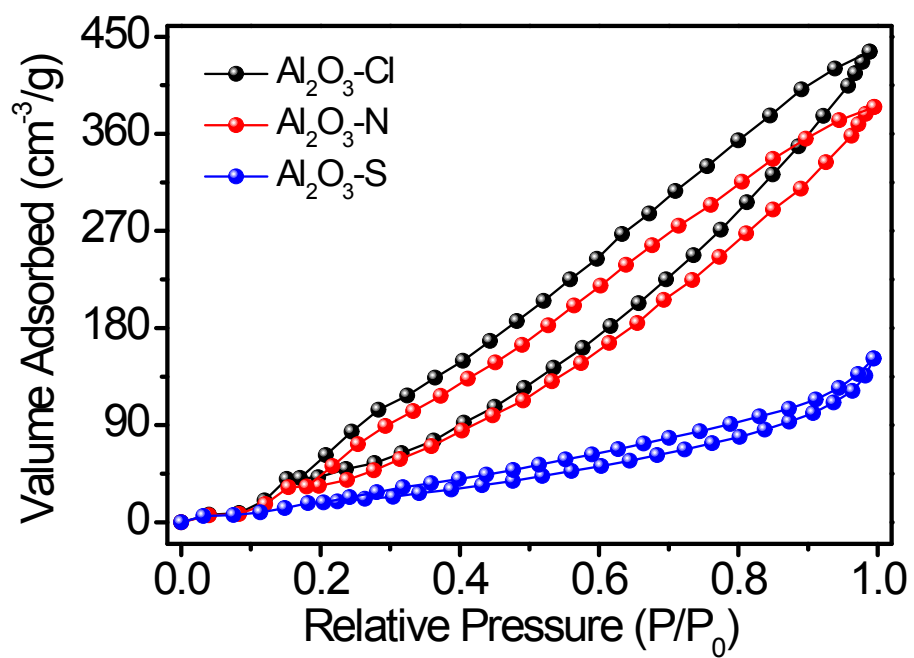

Figure S14. Nitrogen adsorption-desorption isotherms of porous Al<sub>2</sub>O<sub>3</sub>-Cl, Al<sub>2</sub>O<sub>3</sub>-N and Al<sub>2</sub>O<sub>3</sub>-S materials.

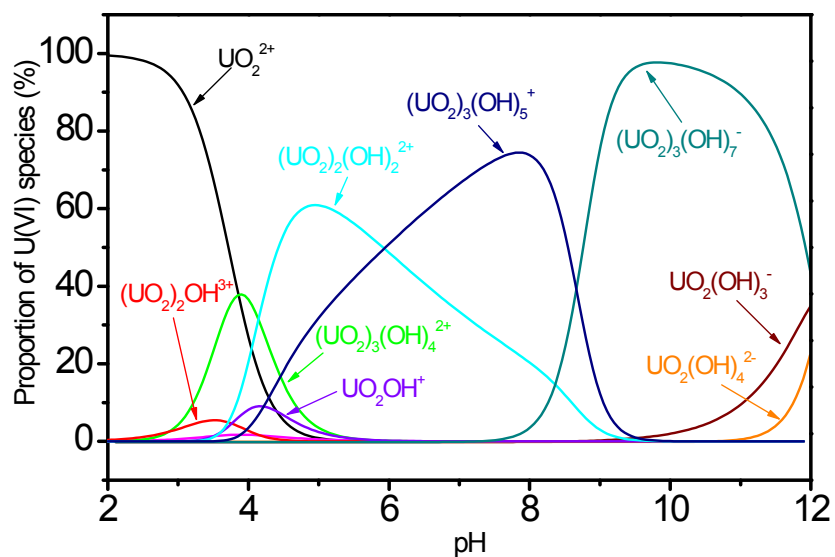

Figure S15. The distribution of U(VI) species in aqueous solution as a function of pH.

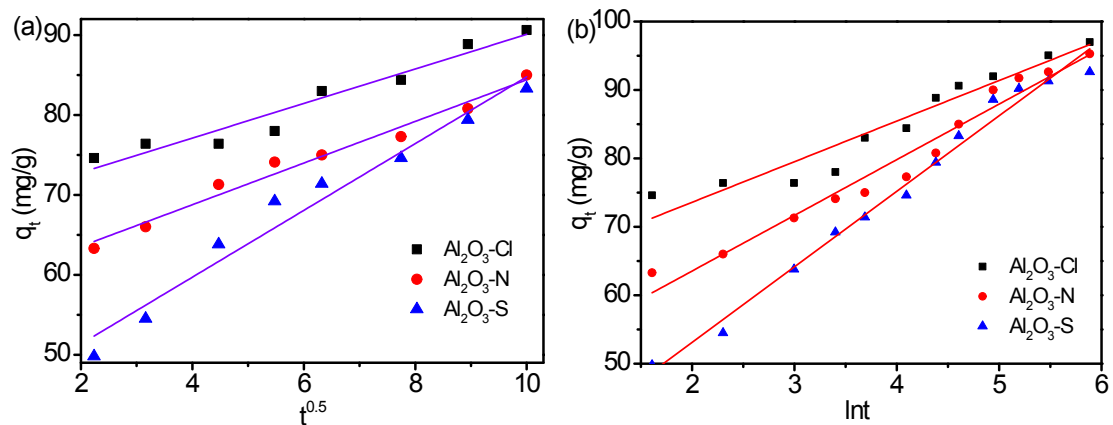

Figure S16. Linearized (a) intraparticle diffusion and (b) Elovich kinetic of U(VI) adsorption on porous  $\text{Al}_2\text{O}_3$ -Cl,  $\text{Al}_2\text{O}_3$ -N and  $\text{Al}_2\text{O}_3$ -S materials.  $T = 298 \text{ K}$ ,  $m/V = 0.1 \text{ g/L}$ ,  $C_{\text{initial}} = 10.0 \text{ mg/L}$ .

Table S4. Comparison of the maximum adsorption capacity of U(VI) by various adsorbents.

| Adsorbents                                         | T (K) | pH  | Capacity (mg/g) | References |
|----------------------------------------------------|-------|-----|-----------------|------------|
| $\text{Mg}_3\text{Si}_4\text{O}_{10}(\text{OH})_2$ | 298   | 7   | 41.6            | [S1]       |
| $\text{Fe}_3\text{O}_4$ NPs                        | 298   | 6   | 95.2            | [S2]       |
| MSONs                                              | 298   | 4   | 526.6           | [S3]       |
| TNTs/ $\text{CoFe}_2\text{O}_4$ /TEPA              | 298   | 6   | 509.89          | [S4]       |
| ND-AO                                              | 298   | 4.5 | 212             | [S5]       |
| purchased $\text{Al}_2\text{O}_3$                  | 298   | 6   | 10              | [28]       |
| $\text{Al}_2\text{O}_3$ nanofibers                 | 298   | 5   | 204.1           | [31]       |
| $\text{Al}_2\text{O}_3$ microspheres               | 298   | 6   | 316.87          | [32]       |
| $\text{Al}_2\text{O}_3$ -Cl                        | 298   | 7   | 805.72          | This work  |
| $\text{Al}_2\text{O}_3$ -N                         | 298   | 7   | 716.74          | This work  |
| $\text{Al}_2\text{O}_3$ -S                         | 298   | 7   | 454.14          | This work  |

Table S5. Comparison of the adsorption efficiency of U(VI) on metal oxide aerogels and other reported adsorbents.

| materials                                   | Adsorption efficiency |              | References |
|---------------------------------------------|-----------------------|--------------|------------|
|                                             | distilled water (%)   | seawater (%) |            |
| poly(imide dioxime)                         | -                     | 29           | [S6]       |
| Al <sub>2</sub> O <sub>3</sub> microspheres | 71.4                  | 28.0         | [32]       |
| PO <sub>4</sub> /PAO                        | 77.6                  | 36           | [S7]       |
| Al <sub>2</sub> O <sub>3</sub> -Cl          | 95.40                 | 57.84        | This work  |
| Al <sub>2</sub> O <sub>3</sub> -N           | 92.99                 | 53.33        | This work  |
| Al <sub>2</sub> O <sub>3</sub> -S           | 89.98                 | 50.16        | This work  |

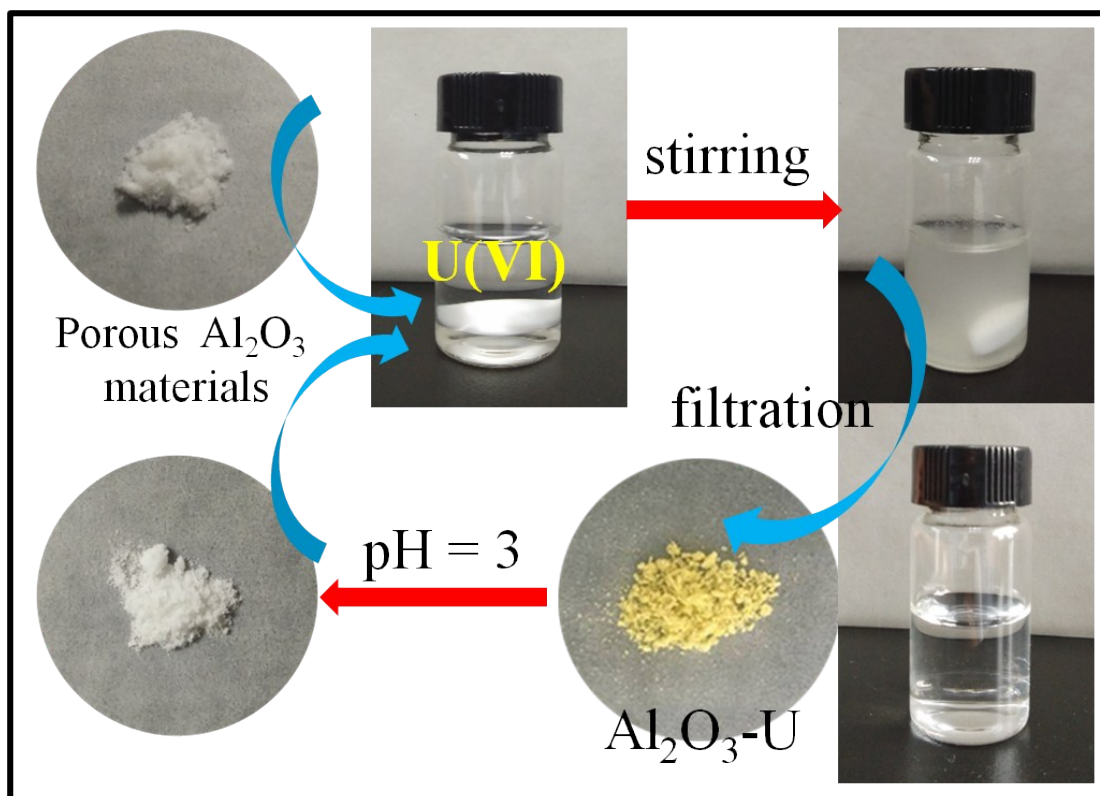

Figure S17. Chemical strategy for recycling of the porous  $\text{Al}_2\text{O}_3$  materials in  $\text{U(VI)}$  adsorption.

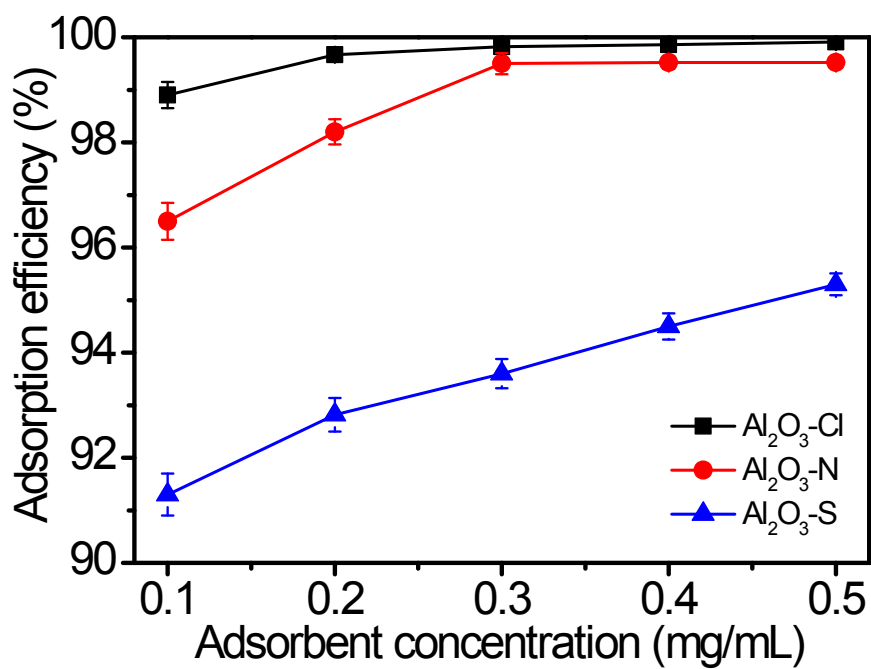

Figure S18. Effect of adsorbent amount on the adsorption efficiency of porous Al<sub>2</sub>O<sub>3</sub>-Cl, Al<sub>2</sub>O<sub>3</sub>-N and Al<sub>2</sub>O<sub>3</sub>-S materials, T = 298 K, pH = 7, C<sub>initial</sub> = 5.0 mg/L.

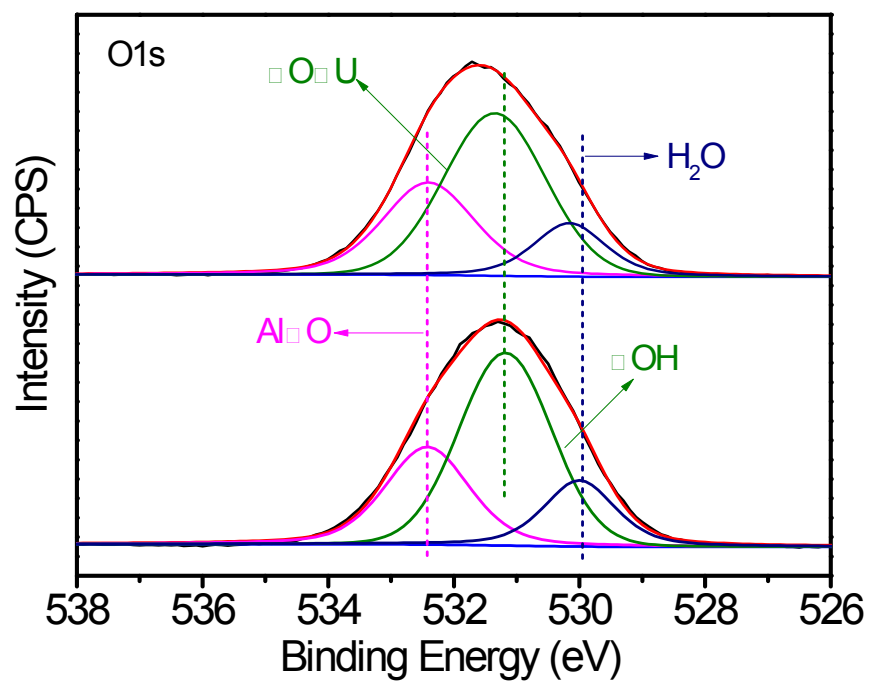

Figure S19. XPS high-resolution spectra of O1s for  $\text{Al}_2\text{O}_3\text{-Cl}$  before and after U(VI) adsorption.



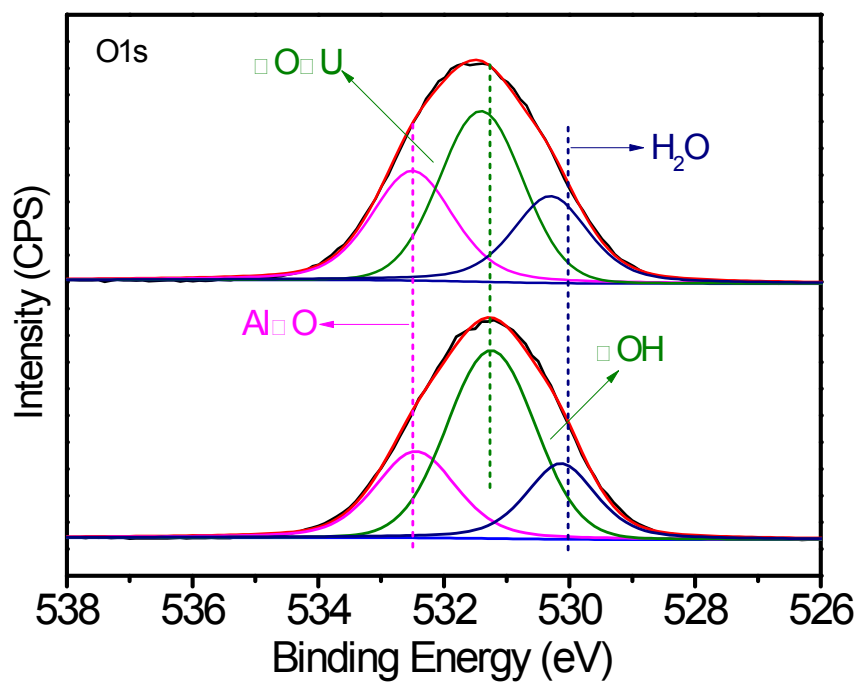

Figure S20. XPS high-resolution spectra of O1s for Al<sub>2</sub>O<sub>3</sub>-N before and after U(VI) adsorption.

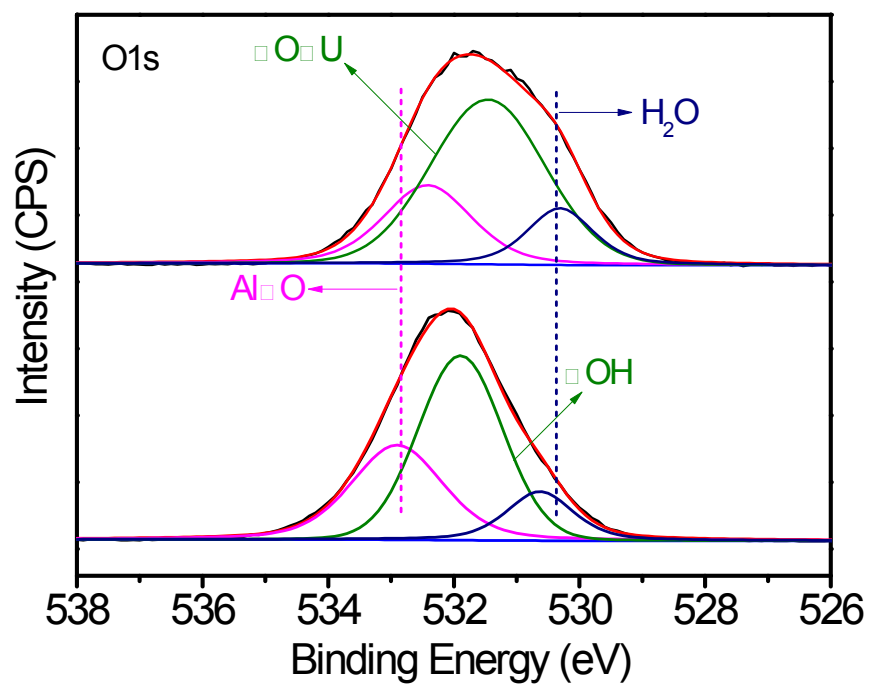

Figure S21. XPS high-resolution spectra of O1s for Al<sub>2</sub>O<sub>3</sub>-Cl before and after U(VI) adsorption.

## References

- [S1] M. Sprynskyy, T. Kowalkowski, H. Tutu, E. M. Cukrowska and B. Buszewski, Adsorption performance of talc for uranium removal from aqueous solution. *Chemical Engineering Journal*. 2011, 171, 1185-1193.
- [S2] P. Singhal, B. G. Vats, A. Yadav and V. Pulhani, Efficient extraction of uranium from environmental samples using phosphoramidate functionalized magnetic nanoparticles: Understanding adsorption and binding mechanisms. *Journal of Hazardous Materials*. 2019, DOI: 10.1016/j.jhazmat.2019.121353.
- [S3] H. Li, Y. Li, B. Li, Y. Dai and Xi Chen, Melamine-induced novel MSONs heterostructured framework: Controlled-switching between MOF and SOF via a self-assembling approach for rapid uranium sequestration. *Chemical Engineering Journal*. 2020, DOI: 10.1016/j.cej.2019.122279.
- [S4] J. Zhu, Q. Liu, Z. Li, J. Liu, H. Zhang, R. Li and J. Wang, Efficient extraction of uranium from aqueous solution using an amino-functionalized magnetic titanate nanotubes. *Journal of Hazardous Materials*. 2018, 353, 9-17.
- [S5] Y. Li, L. Wang, B. Li, M. Zhang, R. Wen, X. Guo, X. Li, J. Zhang, S. Li and L. Ma, Pore-free matrix with cooperative chelating of hyperbranched ligands for high-performance separation of uranium. *ACS Applied Materials & Interfaces*. 2016, 8, 28853-28861.
- [S6] S. Das, S. Brown, R.T. Mayes, C. J. Janke, C. Tsouris, L. J. Kuo, G. Gill, S. Dai, Novel Poly(imide dioxime) Sorbents: Development and Testing for Enhanced Extraction of Uranium from Natural Seawater. *Chemical Engineering Journal*. 2016, 298, 124-135.
- [S7] D. Shao, X. Wang, X. Ren, S. Hu, J. Wen, Z. Tan, J. Xiong, A. M. Asiri and H. M. Marwani, Polyamidoxime functionalized with phosphate groups by plasma technique for effective U(VI) adsorption. *Journal of Industrial and Engineering Chemistry*. 2018, 67, 380-387.
